# Supplementary material
Source: PubMed Central journal article supplement (PMC9969835)
Supplement: NIHMS1850835-supplement-3.pdf [file NIHMS1850835-supplement-3.pdf]

A

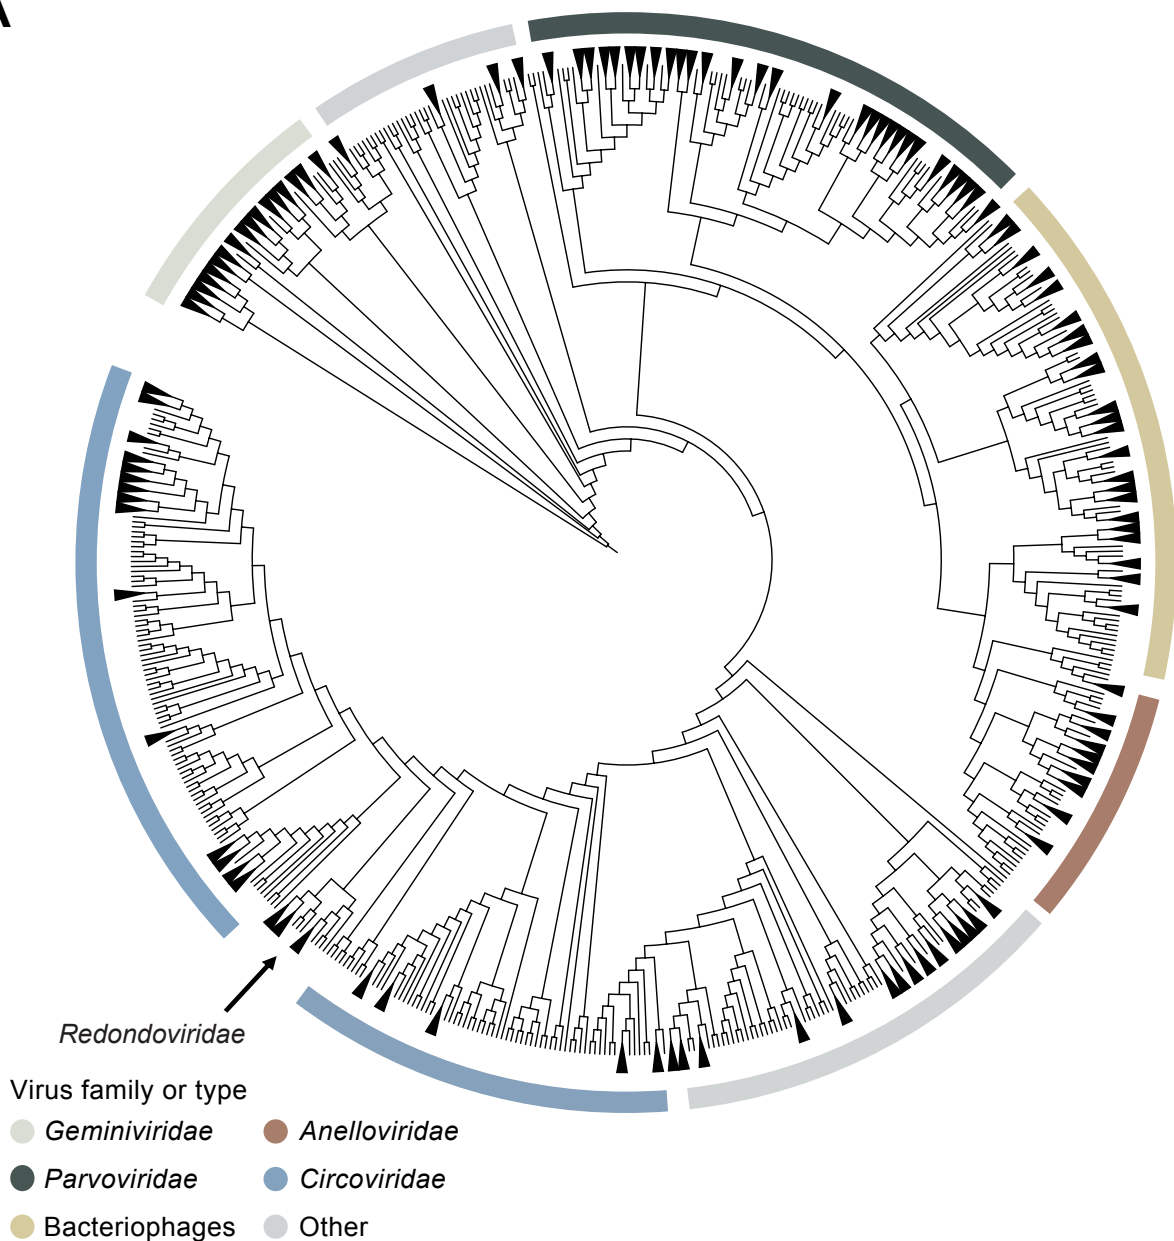

B

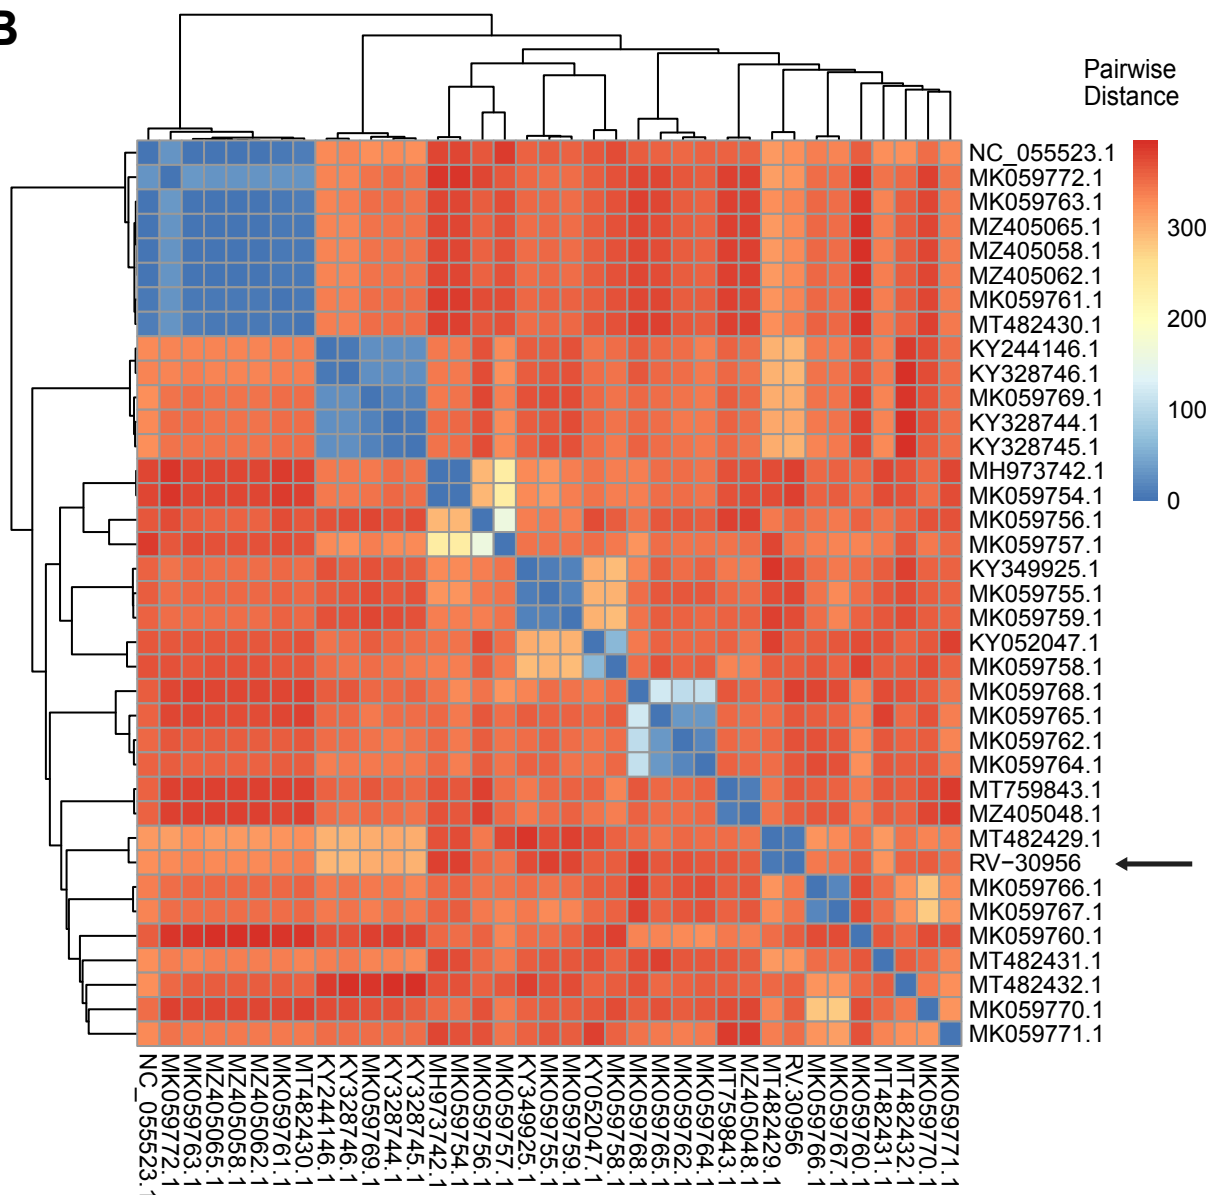

Figure S1. Analysis of redondovirus sequence information; related to Figure 1. (A) Phylogeny of the genomes of 2,164 ssDNA viruses (10 redondovirus genomes and 2,154 genomes of eukaryotic and prokaryotic viruses in the ViPTree ssDNA database; Table S1) based on genome-wide amino-acid sequence similarities in Rep proteins computed by tBLASTx68. iTOL was used for tree visualization and clade collapsing<sup>55</sup>. Colored bands denote virus family or type. Note that redondoviruses cluster distantly in the tree from any annotated ssDNA bacteriophages. (B) Heat map quantifying divergence among known redondovirus Rep protein sequences according to pairwise amino acid distance. RV-30956 is the isolate from the xenic culture described in this work. The R package pheatmap (v1.0.12) was used for figure creation.

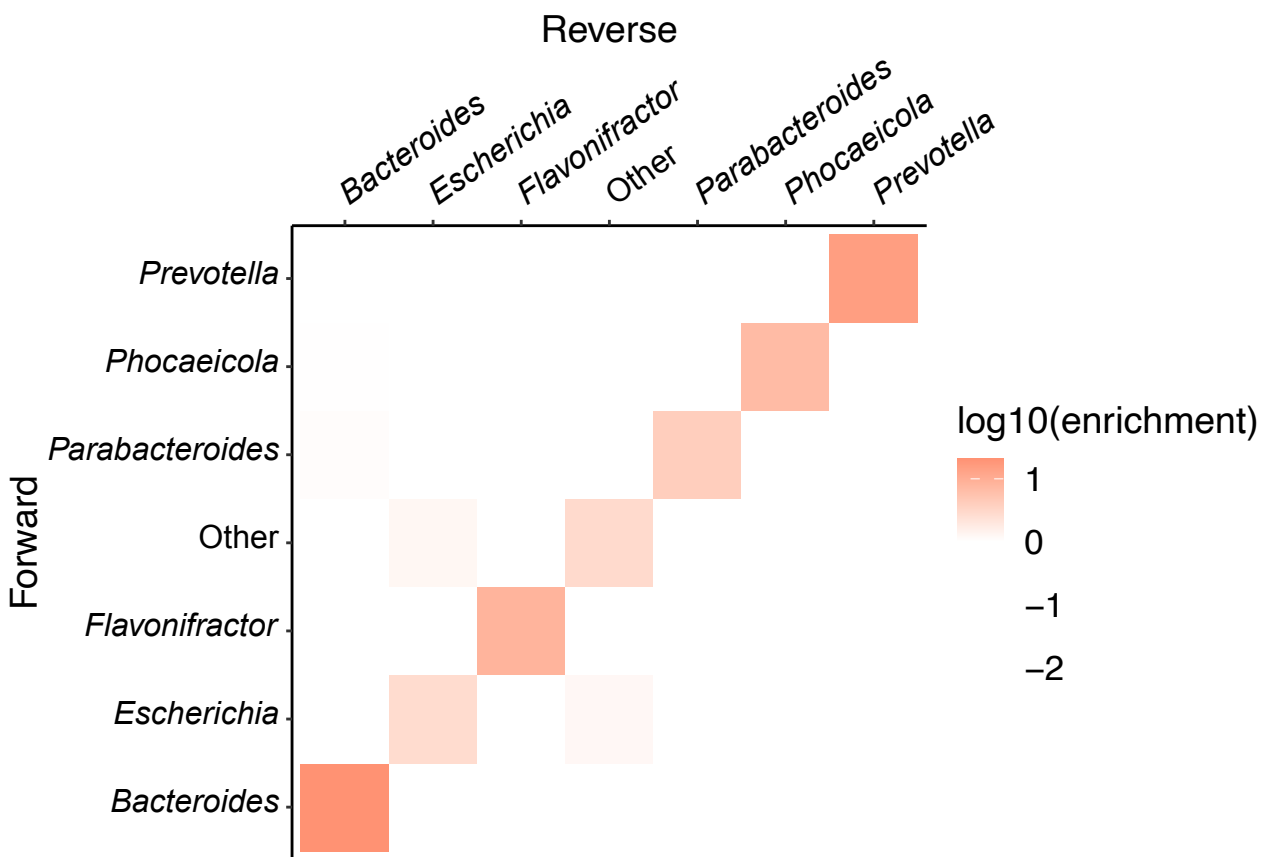

Figure S2. Positive control for the Hi-C data; related to Figure 5. The figure shows the level of enrichment of same species mate pairs in the Hi-C cross-linking data. Taxa are as indicated along the x and y axes and correspond to the most abundant lineages detected in the xenic culture in the metagenomic analysis. Forward indicates forward orientation sequence reads, “reverse” indicates reverse orientation reads. “Other” indicates lineages detected at lower abundances.

Table S2. CRESS virus and putative host genomic GC content; related to Figure 1B.

| <b>virus_family</b> | <b>virus_species</b>                        | <b>median_virus_g_virus_gc_sourc</b> | <b>host</b>     | <b>median_host_gc</b>            | <b>virus_gc_source</b> | <b>virus_host_relationship_source</b>                 |
|---------------------|---------------------------------------------|--------------------------------------|-----------------|----------------------------------|------------------------|-------------------------------------------------------|
| Geminiviridae       | Beet curly top Iran virus                   | 40.85                                | NCBI ID: 6133   | Beta vulgaris                    | 36.2                   | NCBI ID: 221<br>PMID: 34838538                        |
| Geminiviridae       | Spinach curly top Arizona virus             | 40                                   | NCBI ID: 4168   | Spinacia oleracea                | 37.9561                | NCBI ID: 7547<br>PMID: 24658781                       |
| Geminiviridae       | Euphorbia caput-medusae latent virus        | 40.1                                 | NCBI ID: 45103  | Nicotiana benthamiana            | 39.6                   | NCBI ID: 10940<br>doi: 10.1128/JVI.00453-15           |
| Geminiviridae       | French bean severe leaf curl virus          | 40.9                                 | NCBI ID: 14863  | Phaseolus vulgaris               | 33.9867                | NCBI ID: 380<br>PMID: 28283818                        |
| Geminiviridae       | Citrus chlorotic dwarf associated virus     | 44.2                                 | NCBI ID: 14497  | Citrus clementina                | 35.2                   | NCBI ID: 11310<br>PMID: 22749878                      |
| Geminiviridae       | Passion fruit chlorotic mottle virus        | 42.9                                 | NCBI ID: 75612  | Passiflora edulis                | 38.6                   | NCBI ID: 13910<br>PMID: 29614801                      |
| Geminiviridae       | Beet curly top virus                        | 39.75                                | NCBI ID: 4573   | Beta vulgaris                    | 36.2                   | NCBI ID: 221<br>PMID: 16453696                        |
| Geminiviridae       | Spinach severe curly top virus              | 38.1                                 | NCBI ID: 4088   | Spinacia oleracea                | 37.9561                | NCBI ID: 7547<br>PMID: 30743586                       |
| Geminiviridae       | Eragrostis curvula streak virus             | 49.15                                | NCBI ID: 6462   | Eragrostis curvula               | 45.6393                | NCBI ID: 83361<br>PMID: 24658781                      |
| Geminiviridae       | Grapevine red blotch virus                  | 41.45                                | NCBI ID: 22388  | Vitis amurensis                  | 34.3005                | NCBI ID: 13335<br>PMID: 22733880                      |
| Geminiviridae       | Prunus latent virus                         | 42.1                                 | NCBI ID: 79245  | Prunus avium                     | 38.8                   | NCBI ID: 11780<br>PMID: 3067358                       |
| Geminiviridae       | Wild vitis latent virus                     | 41.85                                | NCBI ID: 56301  | Vitis riparia                    | 34.5114                | NCBI ID: 13150<br>PMID: 28942517                      |
| Geminiviridae       | Apple geminivirus 1                         | 45.6                                 | NCBI ID: 108007 | Malus domestica                  | 38.1135                | NCBI ID: 358<br>PMID: 25934791                        |
| Geminiviridae       | Grapevine geminivirus A                     | 43.3                                 | NCBI ID: 46572  | Vitis vinifera                   | 33.8                   | NCBI ID: 401<br>PMID: 27670772                        |
| Geminiviridae       | Maize streak virus                          | 48.85                                | NCBI ID: 4774   | Zea mays                         | 46.7893                | NCBI ID: 12<br>PMID: 20078771                         |
| Geminiviridae       | Wheat dwarf virus                           | 48.6                                 | NCBI ID: 5581   | Triticum aestivum                | 46.041                 | NCBI ID: 11<br>PMID: 11858231                         |
| Geminiviridae       | Wheat dwarf virus                           | 48.6                                 | NCBI ID: 5582   | Hordeum vulgare                  | 44.4537                | NCBI ID: 9<br>PMID: 11858231                          |
| Geminiviridae       | Tomato apical leaf curl virus               | 39.6                                 | NCBI ID: 66644  | Solanum lycopersicum             | 34.7                   | NCBI ID: 7<br>PMID: 29375528                          |
| Geminiviridae       | Tomato pseudo-curly top virus               | 41.6                                 | NCBI ID: 4779   | Solanum lycopersicum             | 34.7                   | NCBI ID: 7<br>PMID: 8638404                           |
| Geminiviridae       | Turnip curly top virus                      | 42.4                                 | NCBI ID: 4009   | Brassica rapa                    | 36.8946                | NCBI ID: 229<br>PMID: 24658781                        |
| Genomoviridae       | Sclerotinia sclerotiorum hypovirulence-assc | 46.8                                 | NCBI ID: 3772   | Sclerotinia sclerotiorum         | 41.6                   | NCBI ID: 487<br>PMID: 27343045                        |
| Redondoviridae      | Vientovirus                                 | 34.6                                 | NCBI ID: 95759  | Entamoeba gingivalis_Einvadens   | 30.3                   | NCBI ID: 376<br>This paper                            |
| Redondoviridae      | Brisavirus                                  | 33.9                                 | NCBI ID: 95759  | Entamoeba gingivalis_Einvadens   | 30.3                   | NCBI ID: 376<br>This paper                            |
| Smacoviridae        | Smacovirus                                  | 49.5                                 | NCBI ID: 70811  | Methanomassiliicoccus intestinal | 41.3                   | NCBI ID: 24496<br>PMID: 30655519                      |
| Naryaviridae        | Entamoeba-associated CRESS virus            | 36.7                                 | NCBI ID: 113528 | Entamoeba histolytica            | 24.95                  | NCBI ID: 27<br>PMID: 32934242                         |
| Nenyaviridae        | Entamoeba-associated CRESS virus            | 35.95                                | NCBI ID: 113527 | Entamoeba histolytica            | 24.95                  | NCBI ID: 27<br>PMID: 32934242                         |
| Vilyaviridae        | Giardia-associated CRESS virus              | 60.5                                 | NCBI ID: 113531 | Giardia duodenalis               | 47.3                   | NCBI ID: 26<br>PMID: 32934242                         |
| Bacilladnaviridae   | Chaetoceros tenuissimus DNA virus type I    | 43.6                                 | NCBI accession: | Chaetoceros tenuissimus          | 38.8737                | NCBI ID: 110089<br>PMID: 21666026                     |
| Bacilladnaviridae   | Chaetoceros tenuissimus DNA virus type II   | 43.6                                 | NCBI ID: 35384  | Chaetoceros tenuissimus          | 38.8737                | NCBI ID: 110089<br>PMID: 25452289                     |
| Nanoviridae         | Faba bean necrotic yellows virus            | 38.6702                              | NCBI ID: 4634   | Glycine max                      | 34.9322                | NCBI ID: 5<br>ISSN: 0031-9465                         |
| Nanoviridae         | Faba bean necrotic yellows virus            | 38.6702                              | NCBI ID: 4634   | Phaseolus vulgaris               | 33.9867                | NCBI ID: 380<br>ISSN: 0031-9468                       |
| Nanoviridae         | Faba bean necrotic yellows virus            | 38.6702                              | NCBI ID: 4634   | Vigna unguiculata                | 32.9                   | NCBI ID: 11030<br>doi: 10.1094/PDIS-11-15-1295-PDN    |
| Nanoviridae         | Milk vetch dwarf virus                      | 39.5075                              | NCBI ID: 4385   | Nicotiana tabacum                | 39                     | NCBI ID: 425<br>doi: 10.1111/ppa.13196                |
| Nanoviridae         | Milk vetch dwarf virus                      | 39.5075                              | NCBI ID: 4385   | Carica papaya                    | 36.0709                | NCBI ID: 513<br>doi: 10.1094/PDIS-02-19-0282-PDN      |
| Nanoviridae         | Milk vetch dwarf virus                      | 39.5075                              | NCBI ID: 4385   | Vicia faba                       | 38.9                   | NCBI ID: 12339<br>doi: 10.1094/PDIS-02-19-0282-PDN    |
| Nanoviridae         | Milk vetch dwarf virus                      | 39.5075                              | NCBI ID: 4385   | Pisum sativum                    | 37.7                   | NCBI ID: 12050<br>doi: 10.1088/1755-1315/694/1/012044 |
| Nanoviridae         | Banana bunchy top virus                     | 40.3094                              | NCBI ID: 4812   | Musa acuminata                   | 37.8645                | NCBI ID: 10976<br>doi: 10.1088/1755-1315/694/1/012044 |
| Nanoviridae         | Banana bunchy top virus                     | 40.3094                              | NCBI ID: 4812   | Musa balbisiana                  | 37.9868                | NCBI ID: 16489<br>doi: 10.1088/1755-1315/694/1/012044 |
| Circoviridae        | Porcine circovirus 1                        | 48.6                                 | NCBI ID: 4272   | Sus scrofa                       | 41.5                   | NCBI ID: 84<br>PMID: 32582087                         |
| Circoviridae        | Porcine circovirus 2                        | 48.4                                 | NCBI ID: 10314  | Sus scrofa                       | 41.5                   | NCBI ID: 84<br>PMID: 32582087                         |
| Circoviridae        | Chicken anemia virus                        | 56.4                                 | NCBI ID: 5587   | Gallus gallus domesticus         | 42.218                 | NCBI ID: 111<br>PMID: 32582087                        |

Table S3. Public metagenomic datasets queried for redondovirus and E. gingivalis DNA; related to Figure 2, Figure 3 and Table 1.

| bioproject_id | body_site    | data_type          | disease_state                                                        | samples | num_rv_pos_samples | note                                                       |
|---------------|--------------|--------------------|----------------------------------------------------------------------|---------|--------------------|------------------------------------------------------------|
| PRJEB42701    | Oral cavity  | Metagenome         | Periodontitis                                                        | 37      | 15                 |                                                            |
| PRJNA552294   | Oral cavity  | Metagenome         | Periodontitis                                                        | 68      | 24                 | pooled with PRJNA508385 because associated with same study |
| PRJNA508385   | Oral cavity  | Metagenome         | Periodontitis                                                        | 25      |                    | pooled with PRJNA552294 because associated with same study |
| PRJNA547717   | Oral cavity  | Metagenome         | Peri-implantitis                                                     | 113     | 41                 |                                                            |
| PRJNA390659   | Lung         | Raw sequence reads | Primary graft dysfunction                                            | 195     | 0                  |                                                            |
| PRJNA419524   | BAL, serum   | Raw sequence reads | Primary graft dysfunction                                            | 120     | 0                  |                                                            |
| PRJNA562600   | Unknown      | Raw sequence reads | Clostridioides difficile infection, inflammatory bowel disease       | 148     | 0                  |                                                            |
| PRJNA661595   | Gut          | Raw sequence reads | Acute myeloid leukemia                                               | 24      | 0                  |                                                            |
| PRJNA625082   | Oral cavity  | Raw sequence reads | Healthy                                                              | 138     | 0                  |                                                            |
| PRJNA580493   | Oral cavity  | Raw sequence reads | Chemotherapy-induced oral mucositis                                  | 107     | 0                  |                                                            |
| PRJNA564282   | Oral cavity  | Raw sequence reads | Congenital neutropenia                                               | 59      | 0                  |                                                            |
| PRJNA549488   | Oral cavity  | Raw sequence reads | Pancreatic cancer                                                    | 558     | 0                  |                                                            |
| PRJNA512456   | Oral cavity  | Raw sequence reads | Cleft lip, cleft palate                                              | 143     | 0                  |                                                            |
| PRJNA488297   | Oral cavity  | Metagenome         | Glycemic condition                                                   | 44      | 0                  |                                                            |
| PRJNA399163   | Oral cavity  | Raw sequence reads | Chemotherapy-induced oral mucositis                                  | 722     | 0                  |                                                            |
| PRJNA387475   | Oral cavity  | Raw sequence reads | Periodontal disease                                                  | 126     | 0                  |                                                            |
| PRJNA362794   | Oral cavity  | Raw sequence reads | Unknown                                                              | 80      | 0                  |                                                            |
| PRJNA352060   | Oral cavity  | Raw sequence reads | Chemotherapy-induced oral mucositis                                  | 850     | 0                  |                                                            |
| PRJNA321193   | Oral cavity  | Metagenome         | Oral squamous cell carcinoma                                         | 542     | 0                  |                                                            |
| PRJNA320081   | Oral cavity  | Raw sequence reads | Healthy                                                              | 26      | 0                  |                                                            |
| PRJNA259979   | Oral cavity  | Targeted loci      | Periodontal disease                                                  | 32      | 0                  |                                                            |
| PRJNA256234   | Oral cavity  | Metagenome         | Periodontal disease                                                  | 10      | 0                  |                                                            |
| PRJEB15392    | Oral cavity  | Metagenome         | Mucositis                                                            | 1       | 0                  |                                                            |
| PRJEB34460    | Vagina       | Metagenome         | Bacterial vaginosis                                                  | 48      | 0                  |                                                            |
| PRJDB9452     | Oral cavity  | Metagenome         | Unknown                                                              | 114     | 0                  |                                                            |
| PRJEB22882    | Oral cavity  | Virome             | Healthy                                                              | 72      | 0                  |                                                            |
| PRJEB29491    | Gut          | Virome             | Unknown                                                              | 91      | 0                  |                                                            |
| PRJEB3206     | Gut          | Metagenome         | Ileocolic Crohn's disease                                            | 38      | 0                  |                                                            |
| PRJEB36291    | Oral cavity  | WGS                | Healthy                                                              | 160     | 0                  |                                                            |
| PRJEB7772     | Gut          | Virome             | Crohn's disease, ulcerative colitis                                  | 338     | 0                  |                                                            |
| PRJEB9524     | Gut          | Virome             | AIDS                                                                 | 66      | 0                  |                                                            |
| PRJEB9818     | Gut          | Virome             | Severe acute undernutrition                                          | 248     | 0                  |                                                            |
| PRJNA196801   | Gut          | Metagenome         | Unknown                                                              | 27      | 0                  |                                                            |
| PRJNA275568   | Gut          | Virome             | Islet autoimmunity                                                   | 96      | 0                  |                                                            |
| PRJNA284162   | Gut          | Metagenome         | Unknown                                                              | 48      | 0                  |                                                            |
| PRJNA327423   | Unknown      | Raw sequence reads | Unknown                                                              | 289     | 0                  |                                                            |
| PRJNA356544   | Gut          | Virome             | Unknown                                                              | 12      | 0                  |                                                            |
| PRJNA385126   | Unknown      | Virome             | Unknown                                                              | 40      | 0                  |                                                            |
| PRJNA387903   | Gut          | Virome             | Type I diabetes                                                      | 220     | 0                  |                                                            |
| PRJNA391511   | Gut          | Virome             | Inflammatory bowel disease, ulcerative colitis                       | 24      | 0                  |                                                            |
| PRJNA407341   | Unknown      | Virome             | Unknown                                                              | 138     | 0                  |                                                            |
| PRJNA413824   | Oral cavity  | Raw sequence reads | Unknown                                                              | 5       | 0                  |                                                            |
| PRJNA415207   | Gut          | Raw sequence reads | Unknown                                                              | 29      | 0                  |                                                            |
| PRJNA418044   | Gut          | Virome             | Unknown                                                              | 80      | 0                  |                                                            |
| PRJNA446038   | Gut          | Virome             | Clostridioides difficile infection, fecal microbiota transplantation | 134     | 0                  |                                                            |
| PRJNA46879    | Gut          | Metagenome         | Crohn's disease                                                      | 600     | 0                  |                                                            |
| PRJNA560212   | Lung         | Metagenome         | COPD                                                                 | 88      | 0                  |                                                            |
| PRJNA608022   | Gut          | Raw sequence reads | Unknown                                                              | 142     | 0                  |                                                            |
| PRJNA631867   | Lung         | Metagenome         | COPD                                                                 | 15      | 0                  |                                                            |
| PRJNA46335    | Lung         | Metagenome         | Febrile illness                                                      | 252     | 0                  |                                                            |
| PRJNA230838   | Oral cavity  | Metagenome         | Unknown                                                              | 88      | 0                  |                                                            |
| PRJNA450104   | Blood, urine | Virome             | Kidney transplant recipients with polyomavirus nephropathy           | 4       | 0                  |                                                            |
| PRJNA473017   | Nasal cavity | Virome             | Respiratory disease                                                  | 1       | 0                  |                                                            |
| PRJNA494633   | Lung         | Virome             | Unknown                                                              | 39      | 0                  |                                                            |
| PRJNA578889   | Gut          | Virome             | Healthy                                                              | 2       | 0                  |                                                            |
| PRJNA608645   | Gut          | Virome             | Unknown                                                              | 1       | 0                  |                                                            |
| PRJNA608022   | Gut          | Metagenome         | Healthy                                                              | 142     | 0                  |                                                            |
| PRJNA644600   | Multiple     | Virome             | Unknown (postmortem)                                                 | 10      | 0                  |                                                            |

Table S4. NCBI accessions for redondovirus and *E. gingivalis* alignment targets; related to Figure 2 and Figure 3.

| <b>NCBI_accession</b> | <b>target_type</b>  | <b>target_length</b> |
|-----------------------|---------------------|----------------------|
| MT759843.1            | Redondovirus genome | 3054                 |
| MT482432.1            | Redondovirus genome | 3054                 |
| MT482431.1            | Redondovirus genome | 3047                 |
| MT482430.1            | Redondovirus genome | 3056                 |
| MT482429.1            | Redondovirus genome | 3045                 |
| KY052047.1            | Redondovirus genome | 3018                 |
| MT482428.1            | Redondovirus genome | 3034                 |
| NC_055523.1           | Redondovirus genome | 3056                 |
| KY244146              | Redondovirus genome | 3054                 |
| KY328744.1            | Redondovirus genome | 3054                 |
| KY328745.1            | Redondovirus genome | 3054                 |
| KY328746.1            | Redondovirus genome | 3054                 |
| KY349925.1            | Redondovirus genome | 3019                 |
| MH973742.1            | Redondovirus genome | 3033                 |
| MK059754.1            | Redondovirus genome | 3049                 |
| MK059755.1            | Redondovirus genome | 3023                 |
| MK059756.1            | Redondovirus genome | 3050                 |
| MK059757.1            | Redondovirus genome | 3026                 |
| MK059758.1            | Redondovirus genome | 3034                 |
| MK059759.1            | Redondovirus genome | 3030                 |
| MK059760.1            | Redondovirus genome | 3043                 |
| MK059761.1            | Redondovirus genome | 3053                 |
| MK059762.1            | Redondovirus genome | 3054                 |
| MK059763.1            | Redondovirus genome | 3056                 |
| MK059764.1            | Redondovirus genome | 3050                 |
| MK059765.1            | Redondovirus genome | 3051                 |
| MK059766.1            | Redondovirus genome | 3052                 |
| MK059767.1            | Redondovirus genome | 3051                 |
| MK059768.1            | Redondovirus genome | 3058                 |
| MK059769.1            | Redondovirus genome | 3053                 |
| MK059770.1            | Redondovirus genome | 3058                 |
| MK059771.1            | Redondovirus genome | 3046                 |
| MK059772.1            | Redondovirus genome | 3046                 |
| MZ405065.1            | Redondovirus genome | 3056                 |
| MZ405064.1            | Redondovirus genome | 3056                 |
| MZ405063.1            | Redondovirus genome | 3056                 |
| MZ405062.1            | Redondovirus genome | 3056                 |
| MZ405061.1            | Redondovirus genome | 3056                 |
| MZ405060.1            | Redondovirus genome | 3056                 |
| MZ405059.1            | Redondovirus genome | 3056                 |
| MZ405058.1            | Redondovirus genome | 3056                 |

|            |                                    |      |
|------------|------------------------------------|------|
| MZ405057.1 | Redondovirus genome                | 3040 |
| MZ405056.1 | Redondovirus genome                | 3056 |
| MZ405055.1 | Redondovirus genome                | 3056 |
| MZ405054.1 | Redondovirus genome                | 3056 |
| MZ405053.1 | Redondovirus genome                | 3040 |
| MZ405052.1 | Redondovirus genome                | 3056 |
| MZ405051.1 | Redondovirus genome                | 3059 |
| MZ405050.1 | Redondovirus genome                | 3059 |
| MZ405049.1 | Redondovirus genome                | 3060 |
| MZ405048.1 | Redondovirus genome                | 3059 |
| MZ405047.1 | Redondovirus genome                | 3056 |
| MZ405046.1 | Redondovirus genome                | 3058 |
| MZ405045.1 | Redondovirus genome                | 3056 |
| MZ405044.1 | Redondovirus genome                | 3056 |
| MZ405043.1 | Redondovirus genome                | 3056 |
| MZ405042.1 | Redondovirus genome                | 3056 |
| MZ405041.1 | Redondovirus genome                | 3056 |
| MZ405040.1 | Redondovirus genome                | 3056 |
| MZ405039.1 | Redondovirus genome                | 3056 |
| MZ405038.1 | Redondovirus genome                | 3059 |
| MZ405037.1 | Redondovirus genome                | 3060 |
| MZ405036.1 | Redondovirus genome                | 3059 |
| MZ405035.1 | Redondovirus genome                | 3055 |
| MZ405034.1 | Redondovirus genome                | 3067 |
| MZ405033.1 | Redondovirus genome                | 3057 |
| MZ405032.1 | Redondovirus genome                | 3057 |
| MZ405031.1 | Redondovirus genome                | 3043 |
| MZ405030.1 | Redondovirus genome                | 3039 |
| MZ405029.1 | Redondovirus genome                | 3084 |
| MZ405028.1 | Redondovirus genome                | 3023 |
| MZ405027.1 | Redondovirus genome                | 3090 |
| MZ405026.1 | Redondovirus genome                | 3023 |
| MZ405025.1 | Redondovirus genome                | 3023 |
| MZ405024.1 | Redondovirus genome                | 3023 |
| MZ405023.1 | Redondovirus genome                | 3038 |
| MZ405022.1 | Redondovirus genome                | 3056 |
| MZ405021.1 | Redondovirus genome                | 2955 |
| MZ405020.1 | Redondovirus genome                | 3061 |
| MZ405019.1 | Redondovirus genome                | 3049 |
| MZ405018.1 | Redondovirus genome                | 3049 |
| D28490.1   | <i>E. gingivalis</i> SrRNA gene    | 1918 |
| KX027298.1 | <i>E. gingivalis</i> small subunit | 2287 |
| KX027297.1 | <i>E. gingivalis</i> small subunit | 2316 |
| KX027296.1 | <i>E. gingivalis</i> small subunit | 2339 |
| KX027295.1 | <i>E. gingivalis</i> small subunit | 2186 |

|            |                                    |      |
|------------|------------------------------------|------|
| KX027294.1 | <i>E. gingivalis</i> small subunit | 2336 |
| KX061779.1 | <i>E. gingivalis</i> 18S rRNA ger  | 660  |
| KX061778.1 | <i>E. gingivalis</i> 18S rRNA ger  | 655  |
| MG601094.1 | <i>E. gingivalis</i> 18S rRNA ger  | 450  |
| KF250436.1 | <i>E. gingivalis</i> 18S rRNA ger  | 631  |
| KF250435.1 | <i>E. gingivalis</i> 18S rRNA ger  | 625  |
| KF250434.1 | <i>E. gingivalis</i> 18S rRNA ger  | 637  |
| KF250433.1 | <i>E. gingivalis</i> 18S rRNA ger  | 623  |
| MZ388564.1 | <i>E. gingivalis</i> small subunit | 460  |
| MZ388563.1 | <i>E. gingivalis</i> small subunit | 462  |
| MZ388562.1 | <i>E. gingivalis</i> small subunit | 451  |
| MZ388561.1 | <i>E. gingivalis</i> small subunit | 460  |
| MZ388560.1 | <i>E. gingivalis</i> small subunit | 454  |
| MZ388559.1 | <i>E. gingivalis</i> small subunit | 463  |
| KX027293.1 | <i>E. gingivalis</i> 18S rRNA ger  | 500  |
| KX027292.1 | <i>E. gingivalis</i> 18S rRNA ger  | 368  |
| KX027291.1 | <i>E. gingivalis</i> 18S rRNA ger  | 369  |
| KX027290.1 | <i>E. gingivalis</i> 18S rRNA ger  | 520  |
| KX027289.1 | <i>E. gingivalis</i> 18S rRNA ger  | 489  |
| KX027288.1 | <i>E. gingivalis</i> 18S rRNA ger  | 369  |
| KX027287.1 | <i>E. gingivalis</i> 18S rRNA ger  | 368  |
| KX027286.1 | <i>E. gingivalis</i> 18S rRNA ger  | 369  |
| MW676260.1 | <i>E. gingivalis</i> small subunit | 370  |

Table S5. Metadata for COVID and non-COVID ICU patients; related to Table 1.

| subject_id | age | gender | diagnoses                         | mech_ventilation        | eging_mean_ct   | eging_call | rv_mean_ct | rv_call    | covid_status |
|------------|-----|--------|-----------------------------------|-------------------------|-----------------|------------|------------|------------|--------------|
| 560        | 79  | male   | sepsis, acute kidney injury       | tracheostomy            |                 | 40 neg     |            | 40 neg     | nonCOVID     |
| 562        | 71  | male   | septic shock, hypoxic respirat    | tracheostomy            |                 | 40 neg     |            | 40 neg     | nonCOVID     |
| 563        | 27  | male   | septic shock, hypoxic respirat    | endotracheal intubation |                 | 40 neg     |            | 40 neg     | nonCOVID     |
| 564        | 60  | female | B-cell lymphoma, malignant h      | endotracheal intubation |                 | 40 neg     |            | 40 neg     | nonCOVID     |
| 565        | 65  | mae    | hypoxic respiratory failure sec   | tracheostomy            |                 | 40 neg     |            | 40 neg     | nonCOVID     |
| 566        | 47  | male   | septic shock, hypoxemic & hy      | endotracheal intubation |                 | 40 neg     |            | 40 neg     | nonCOVID     |
| 567        | 64  | male   | hypoxic respiratory failure, pu   | endotracheal intubation | 34.9 pos        |            | 30.26 pos  |            | nonCOVID     |
| 568        | 20  | female | bacterial pneumonia, sepsis, l    | endotracheal intubation |                 | 40 neg     |            | 40 neg     | nonCOVID     |
| 569        | 52  | female | hypoxemic respiratory failure,    | endotracheal intubation |                 | 40 neg     |            | 40 neg     | nonCOVID     |
| 570        | 77  | male   | septic shock                      | endotracheal intubation |                 | 40 neg     |            | 40 neg     | nonCOVID     |
| 571        | 55  | male   | hypoxemic respiratory failure,    | endotracheal intubation |                 | 40 neg     |            | 40 neg     | nonCOVID     |
| 572        | 51  | female | hypoxemic respiratory failure,    | tracheostomy            |                 | 40 neg     |            | 40 neg     | nonCOVID     |
| 573        | 49  | male   | multiple myeloma, septic shoc     | endotracheal intubation |                 | 40 neg     |            | 40 neg     | nonCOVID     |
| 576        | 64  | male   | septic shock, respiratory failur  | endotracheal intubation |                 | 40 neg     |            | 40 neg     | nonCOVID     |
| 577        | 60  | male   | hypoxemic respiratory failure,    | endotracheal intubation |                 | 40 neg     |            | 40 neg     | nonCOVID     |
| 578        | 55  | female | hypoxemic respiratory failure,    | endotracheal intubation |                 | 40 neg     |            | 40 neg     | nonCOVID     |
| 579        | 63  | female | hypoxic respiratory failure, se   | endotracheal intubation |                 | 40 neg     |            | 40 neg     | nonCOVID     |
| 581        | 30  | male   | hypoxemic respiratory failure,    | endotracheal intubation |                 | 40 neg     |            | 40 neg     | nonCOVID     |
| 582        | 68  | male   | septic shock, PEA arrest, hypc    | endotracheal intubation |                 | 40 neg     |            | 40 neg     | nonCOVID     |
| 583        | 61  | female | hypoxemic respiratory failure,    | endotracheal intubation |                 | 40 neg     |            | 40 neg     | nonCOVID     |
| 584        | 62  | male   | hemorrhagic stroke, hypoxic r     | endotracheal intubation |                 | 40 neg     |            | 40 neg     | nonCOVID     |
| 585        | 49  | male   | acute renal failure, cirrhosis, z | endotracheal intubation |                 | 40 neg     |            | 40 neg     | nonCOVID     |
| 586        | 61  | male   | multipressor shock, respirator    | endotracheal intubation | 29.55 pos       |            | 33.4 pos   |            | nonCOVID     |
| CORE079    | 58  | male   | hypoxia                           | endotracheal intubation |                 | 40 neg     |            | 40 neg     | nonCOVID     |
| CORE068    | 35  | male   | MRSA bacteremia, ventilator-      | endotracheal intubation |                 | 40 neg     |            | 40 neg     | nonCOVID     |
| CORE0179   | 76  | female | hypoxia                           | endotracheal intubation |                 | 40 neg     |            | 40 neg     | nonCOVID     |
| CORE0180   | 51  | male   | acute hypoxic respiratory failu   | endotracheal intubation |                 | 40 neg     |            | 40 neg     | nonCOVID     |
| CORE0181   | 39  | female | respiratory failure               | endotracheal intubation |                 | 40 neg     |            | 40 neg     | nonCOVID     |
| CORE0182   | 61  | male   | pneumonia, MRSA bacteremi         | none                    |                 | 40 neg     |            | 40 neg     | nonCOVID     |
| CORE0184   | 56  | male   | hypoxia                           | endotracheal intubation |                 | 40 neg     |            | 40 neg     | nonCOVID     |
| CORE0185   | 60  | male   | sepsis, acute respiratory failur  | endotracheal intubation |                 | 40 neg     |            | 40 neg     | nonCOVID     |
| CORE0187   | 55  | male   | sepsis, multifocal pneumonia,     | endotracheal intubation |                 | 40 neg     |            | 40 neg     | nonCOVID     |
| CORE0188   | 57  | male   | hypoxia, shock                    | endotracheal intubation |                 | 40 neg     |            | 40 neg     | nonCOVID     |
| CORE0189   | 81  | female | shock, pneumonia                  | endotracheal intubation |                 | 40 neg     |            | 40 neg     | nonCOVID     |
| CORE0190   | 60  | male   | hypoxia, pneumonia                | endotracheal intubation |                 | 40 neg     |            | 40 neg     | nonCOVID     |
| CORE0294   | 63  | male   | tachypneic, hypercarbia           | none                    |                 | 40 neg     |            | 40 neg     | nonCOVID     |
| CORE0295   | 71  | female | hemodynamic instability           | none                    | 37.99021333 pos |            | 34.622 pos |            | nonCOVID     |
| CORE0296   | 94  | male   | respiratory failure,sepsis        | none                    |                 | 40 neg     |            | 40 neg     | nonCOVID     |
| CORE0193   | 63  | male   | COVID                             | none                    |                 | 40 neg     |            | 40 neg     | COVID        |
| CORE0196   | 38  | male   | COVID                             | endotracheal intubation | 31.70433333 pos |            | 24.067 pos |            | COVID        |
| CORE0197   | 51  | male   | COVID                             | endotracheal intubation | 37.22081944 pos |            | 31.251 pos |            | COVID        |
| CORE0200   | 74  | male   | COVID                             | none                    |                 | 40 neg     |            | 40 neg     | COVID        |
| CORE0201   | 58  | female | COVID                             | none                    |                 | 40 neg     |            | 40 neg     | COVID        |
| CORE0202   | 55  | male   | COVID                             | none                    |                 | 40 neg     |            | 40 neg     | COVID        |
| CORE0203   | 53  | male   | COVID                             | endotracheal intubation | 35.66266667 pos |            | 25.18 pos  |            | COVID        |
| CORE0204   | 66  | male   | COVID                             | endotracheal intubation | 39.00620433 pos |            | 29.209 pos |            | COVID        |
| CORE0205   | 41  | male   | COVID                             | endotracheal intubation |                 | 40 neg     |            | 30.514 pos | COVID        |
| CORE0206   | 79  | female | COVID                             | endotracheal intubation |                 | 40 neg     |            | 40 neg     | COVID        |
| CORE0207   | 69  | female | COVID                             | endotracheal intubation |                 | 40 neg     |            | 40 neg     | COVID        |
| CORE0208   | 76  | male   | COVID                             | none                    |                 | 40 neg     |            | 40 neg     | COVID        |
| CORE0209   | 71  | male   | COVID                             | endotracheal intubation | 38.54933333 pos |            |            | 40 neg     | COVID        |
| CORE0210   | 70  | male   | COVID                             | endotracheal intubation |                 | 40 neg     |            | 40 neg     | COVID        |
| CORE0211   | 67  | female | COVID                             | endotracheal intubation | 34.08166667 pos |            | 29.11 pos  |            | COVID        |
| CORE0212   | 60  | female | COVID                             | endotracheal intubation |                 | 40 neg     |            | 40 neg     | COVID        |
| CORE0213   | 70  | female | COVID                             | endotracheal intubation |                 | 40 neg     |            | 40 neg     | COVID        |
| CORE0215   | 44  | female | COVID                             | none                    | 32.507 pos      |            |            | 40 neg     | COVID        |
| CORE0216   | 59  | female | COVID                             | endotracheal intubation | 32.89566667 pos |            |            | 40 neg     | COVID        |
| CORE0218   | 53  | male   | COVID                             | endotracheal intubation |                 | 40 neg     |            | 40 neg     | COVID        |
| CORE0219   | 61  | female | COVID                             | endotracheal intubation |                 | 40 neg     |            | 40 neg     | COVID        |
| CORE0220   | 86  | female | COVID                             | none                    |                 | 40 neg     |            | 40 neg     | COVID        |
| CORE0221   | 77  | male   | COVID                             | endotracheal intubation | 33.97766667 pos |            | 25.622 pos |            | COVID        |
| CORE0222   | 54  | male   | COVID                             | endotracheal intubation | 31.725 pos      |            |            | 40 neg     | COVID        |
| CORE0223   | 84  | female | COVID                             | endotracheal intubation |                 | 40 neg     |            | 40 neg     | COVID        |
| CORE0224   | 52  | male   | COVID                             | none                    |                 | 40 neg     |            | 40 neg     | COVID        |
| CORE0225   | 65  | male   | COVID                             | endotracheal intubation |                 | 40 neg     |            | 40 neg     | COVID        |
| CORE0226   | 62  | female | COVID                             | none                    |                 | 40 neg     |            | 40 neg     | COVID        |
| CORE0227   | 54  | female | COVID                             | endotracheal intubation | 38.05666667 pos |            | 27.191 pos |            | COVID        |
| CORE0228   | 65  | male   | COVID                             | endotracheal intubation |                 | 40 neg     |            | 40 neg     | COVID        |
| CORE0229   | 84  | male   | COVID                             | none                    |                 | 40 neg     |            | 40 neg     | COVID        |
| CORE0230   | 55  | female | COVID                             | none                    | 39.25833333 neg |            |            | 40 neg     | COVID        |
| CORE0232   | 54  | female | COVID                             | none                    |                 | 40 neg     |            | 40 neg     | COVID        |
| CORE0233   | 73  | male   | COVID                             | none                    |                 | 40 neg     |            | 40 neg     | COVID        |
| CORE0234   | 75  | female | COVID                             | none                    |                 | 40 neg     |            | 40 neg     | COVID        |
| CORE0235   | 76  | male   | COVID                             | none                    |                 | 40 neg     |            | 40 neg     | COVID        |
| CORE0236   | 70  | female | COVID                             | endotracheal intubation |                 | 40 neg     |            | 40 neg     | COVID        |
| CORE0237   | 64  | male   | COVID                             | none                    |                 | 40 neg     |            | 40 neg     | COVID        |
| CORE0238   | 57  | female | COVID                             | none                    |                 | 40 neg     |            | 40 neg     | COVID        |
| CORE0239   | 73  | female | COVID                             | endotracheal intubation |                 | 40 neg     |            | 40 neg     | COVID        |
| CORE0240   | 85  | male   | COVID                             | endotracheal intubation |                 | 40 neg     |            | 40 neg     | COVID        |
| CORE0242   | 58  | male   | COVID                             | endotracheal intubation |                 | 40 neg     |            | 40 neg     | COVID        |
| CORE0244   | 37  | male   | COVID                             | none                    |                 | 40 neg     |            | 40 neg     | COVID        |
| CORE0245   | 72  | male   | COVID                             | none                    |                 | 40 neg     |            | 40 neg     | COVID        |



|          |           |       |                         |                 |                 |       |
|----------|-----------|-------|-------------------------|-----------------|-----------------|-------|
| CORE0246 | 50 female | COVID | none                    | 40 neg          | 40 neg          | COVID |
| CORE0247 | 60 male   | COVID | none                    | 40 neg          | 40 neg          | COVID |
| CORE0248 | 38 male   | COVID | endotracheal intubation | 34.88308 pos    | 25.333 pos      | COVID |
| CORE0251 | 65 female | COVID | endotracheal intubation | 40 neg          | 40 neg          | COVID |
| CORE0252 | 67 male   | COVID | endotracheal intubation | 40 neg          | 40 neg          | COVID |
| CORE0253 | 79 female | COVID | none                    | 40 neg          | 40 neg          | COVID |
| CORE0254 | 66 male   | COVID | none                    | 40 neg          | 40 neg          | COVID |
| CORE0255 | 58 male   | COVID | endotracheal intubation | 40 neg          | 40 neg          | COVID |
| CORE0256 | 46 female | COVID | endotracheal intubation | 40 neg          | 40 neg          | COVID |
| CORE0257 | 90 female | COVID | none                    | 38.502 pos      | 40 neg          | COVID |
| CORE0258 | 89 female | COVID | none                    | 40 neg          | 40 neg          | COVID |
| CORE0259 | 54 male   | COVID | none                    | 40 neg          | 40 neg          | COVID |
| CORE0260 | 62 male   | COVID | endotracheal intubation | 33.02766667 pos | 21.90873019 pos | COVID |
| CORE0261 | 88 female | COVID | endotracheal intubation | 40 neg          | 40 neg          | COVID |
| CORE0262 | 78 male   | COVID | none                    | 40 neg          | 40 neg          | COVID |
| CORE0263 | 62 female | COVID | endotracheal intubation | 40 neg          | 40 neg          | COVID |
| CORE0264 | 67 female | COVID | none                    | 40 neg          | 40 neg          | COVID |
| CORE0266 | 54 male   | COVID | endotracheal intubation | 40 neg          | 40 neg          | COVID |
| CORE0268 | 67 female | COVID | none                    | 40 neg          | 40 neg          | COVID |
| CORE0269 | 57 male   | COVID | endotracheal intubation | 40 neg          | 40 neg          | COVID |
| CORE0270 | 64 male   | COVID | none                    | 40 neg          | 40 neg          | COVID |
| CORE0271 | 89 female | COVID | none                    | 40 neg          | 40 neg          | COVID |
| CORE0272 | 61 male   | COVID | endotracheal intubation | 40 neg          | 40 neg          | COVID |
| CORE0275 | 57 female | COVID | endotracheal intubation | 40 neg          | 40 neg          | COVID |
| CORE0276 | 73 male   | COVID | none                    | 40 neg          | 40 neg          | COVID |
| CORE0277 | 70 male   | COVID | none                    | 40 neg          | 40 neg          | COVID |
| CORE0278 | 82 female | COVID | none                    | 40 neg          | 40 neg          | COVID |
| CORE0279 | 78 female | COVID | endotracheal intubation | 40 neg          | 40 neg          | COVID |
| CORE0280 | 91 female | COVID | none                    | 40 neg          | 40 neg          | COVID |
| CORE0282 | 58 male   | COVID | endotracheal intubation | 40 neg          | 40 neg          | COVID |
| CORE0283 | 83 male   | COVID | none                    | 40 neg          | 40 neg          | COVID |
| CORE0284 | 76 male   | COVID | none                    | 40 neg          | 40 neg          | COVID |
| CORE0285 | 77 male   | COVID | none                    | 40 neg          | 40 neg          | COVID |
| CORE0286 | 52 male   | COVID | none                    | 40 neg          | 40 neg          | COVID |
| CORE0287 | 69 female | COVID | none                    | 40 neg          | 40 neg          | COVID |
| CORE0288 | 36 female | COVID | endotracheal intubation | 40 neg          | 40 neg          | COVID |
| CORE0289 | 77 female | COVID | none                    | 40 neg          | 40 neg          | COVID |
| CORE0290 | 64 female | COVID | none                    | 40 neg          | 40 neg          | COVID |
| CORE0291 | 69 female | COVID | none                    | 40 neg          | 40 neg          | COVID |
| CORE0292 | 62 female | COVID | none                    | 40 neg          | 40 neg          | COVID |
| CORE0293 | 39 female | COVID | none                    | 40 neg          | 40 neg          | COVID |
| CORE0297 | 84 male   | COVID | none                    | 40 neg          | 40 neg          | COVID |
| CORE0298 | 61 female | COVID | none                    | 40 neg          | 40 neg          | COVID |
| CORE0299 | 66 female | COVID | none                    | 40 neg          | 40 neg          | COVID |

Table S6. Metadata for healthy volunteers; related to Table 1.

| subject_id | age | gender | condition | eging_mean_ct | eging_call | rv_mean_ct | rv_call |
|------------|-----|--------|-----------|---------------|------------|------------|---------|
| HSAL001    | 62  | male   | healthy   | 40            | neg        | 40         | neg     |
| HSAL002    | 27  | male   | healthy   | 40            | neg        | 40         | neg     |
| HSAL003    | 69  | male   | healthy   | 31.81685448   | pos        | 22.5570116 | pos     |
| HSAL004    | 44  | female | healthy   | 40            | neg        | 40         | neg     |
| HSAL005    | 30  | female | healthy   | 32.87300618   | pos        | 30.5517006 | pos     |
| HSAL006    | 35  | male   | healthy   | 40            | neg        | 40         | neg     |
| HSAL007    | 23  | female | healthy   | 40            | neg        | 40         | neg     |
| HSAL008    | 25  | female | healthy   | 36.41320038   | pos        | 21.4607277 | pos     |
| HSAL009    | 54  | man    | healthy   | 35.25453568   | pos        | 24.485199  | pos     |
| HSAL010    | 26  | female | healthy   | 40            | neg        | 40         | neg     |
| HSAL011    | 61  | male   | healthy   | 32.92948023   | pos        | 19.3685875 | pos     |
| HSAL012    | 29  | male   | healthy   | 40            | neg        | 40         | neg     |
| HSAL013    | 25  | male   | healthy   | 38.00668335   | pos        | 40         | neg     |
| HSAL014    | 27  | male   | healthy   | 40            | neg        | 40         | neg     |
| HSAL015    | 40  | male   | healthy   | 40            | neg        | 40         | neg     |
| HSAL016    | 43  | male   | healthy   | 40            | neg        | 40         | neg     |
| HSAL017    | 26  | male   | healthy   | 39.42346954   | pos        | 40         | neg     |
| HSAL018    | 31  | female | healthy   | 34.5552508    | pos        | 16.4751921 | pos     |
| HSAL019    | 29  | male   | healthy   | 31.02448463   | pos        | 15.2343102 | pos     |
| HSAL020    | 29  | male   | healthy   | 34.88836288   | pos        | 21.1071272 | pos     |
| HSAL021    | 62  | male   | healthy   | 40            | neg        | 40         | neg     |
| HSAL022    | 25  | male   | healthy   | 40            | neg        | 40         | neg     |
| HSAL023    | 28  | male   | healthy   | 33.26438777   | pos        | 24.8730164 | pos     |
| HSAL024    | 32  | male   | healthy   | 32.76446279   | pos        | 40         | neg     |
| HSAL025    | 31  | female | healthy   | 40            | neg        | 39.8286781 | pos     |
| HSAL026    | 24  | female | healthy   | 40            | neg        | 40         | neg     |
| HSAL027    | 23  | male   | healthy   | 40            | neg        | 40         | neg     |
| HSAL028    | 59  | male   | healthy   | 30.15873782   | pos        | 33.2940178 | pos     |
| HSAL029    | 28  | female | healthy   | 40            | neg        | 40         | neg     |
| HSAL030    | 25  | male   | healthy   | 40            | neg        | 40         | neg     |
| HSAL031    | 24  | female | healthy   | 40            | neg        | 40         | neg     |
| HSAL032    | 59  | male   | healthy   | 36.55816015   | pos        | 20.5655174 | pos     |
| HSAL033    | 27  | female | healthy   | 40            | neg        | 40         | neg     |
| HSAL034    | 39  | male   | healthy   | 34.5106837    | pos        | 40         | neg     |
| HSAL035    | 35  | male   | healthy   | 35.04918416   | pos        | 40         | neg     |
| HSAL036    | 29  | female | healthy   | 35.79909897   | pos        | 14.5406661 | pos     |
| HSAL037    | 32  | male   | healthy   | 34.78148142   | pos        | 21.4707489 | pos     |
| HSAL038    | 24  | female | healthy   | 40            | neg        | 40         | neg     |
| HSAL039    | 36  | male   | healthy   | 40            | neg        | 39.5556202 | pos     |
| HSAL040    | 52  | female | healthy   | 40            | neg        | 35.1434994 | pos     |
| HSAL041    | 23  | male   | healthy   | 40            | neg        | 40         | neg     |
| HSAL042    | 22  | female | healthy   | 40            | neg        | 39.7518406 | pos     |
| HSAL043    | 30  | female | healthy   | 35.98237356   | pos        | 22.1353025 | pos     |
| HSAL044    | 32  | male   | healthy   | 40            | neg        | 40         | neg     |
| HSAL045    | 27  | female | healthy   | 36.63756943   | pos        | 40         | neg     |
| HSAL046    | 26  | male   | healthy   | 38.38454946   | pos        | 40         | neg     |
| HSAL047    | 32  | female | healthy   | 40            | neg        | 40         | neg     |
| HSAL048    | 27  | female | healthy   | 40            | neg        | 40         | neg     |
| HSAL049    | 28  | male   | healthy   | 40            | neg        | 39.7566147 | pos     |
| HSAL050    | 33  | male   | healthy   | 37.73811467   | pos        | 21.553649  | pos     |

Table S7. Public metatranscriptomic datasets queried for redondovirus and *E. gingivalis* RNA; related to Table 1.

| <b>bioproject_id</b> | <b>body_site</b>   | <b>sample_type</b>  | <b>disease_state</b>       | <b>samples</b> | <b>num_rv_pos_samples</b> |
|----------------------|--------------------|---------------------|----------------------------|----------------|---------------------------|
| PRJNA221620          | Oral cavity        | Gingival tissue     | Periodontitis              | 6              | 3                         |
| PRJNA319790          | Oral cavity        | Gingival tissue     | Periodontitis              | 2              | 1                         |
| PRJNA780253          | Oral cavity        | Oral tumors         | Squamous cell carcinom     | 30             | 0                         |
| PRJEB44678           | Oral cavity        | Hard palate swabs   | Unknown (deceased)         | 17             | 0                         |
| PRJEB4673            | Oral cavity        | Dental plaque       | Unknown                    | 16             | 0                         |
| PRJDB3765            | Oral cavity        | Subgingival biofilm | Periodontitis, peri-implar | 24             | 0                         |
| PRJNA815964          | Oral cavity        | Unknown             | Oral cancer                | 7              | 0                         |
| PRJNA776154          | Oral cavity        | Mucosal tissue      | Oral cancer                | 66             | 0                         |
| PRJNA322414          | Lung               | Sputum              | COPD                       | 2              | 0                         |
| PRJNA390194          | Lung               | BAL                 | COPD                       | 35             | 0                         |
| PRJNA196118          | Gut                | Small intestine     | Ileostoma                  | 18             | 0                         |
| PRJNA354235          | Gut                | Fecal matter        | Healthy                    | 1307           | 0                         |
| PRJNA563930          | Skin               | Ulcer biopsy        | Diabetes                   | 16             | 0                         |
| PRJNA260091          | Skin               | Follicular content  | Acne                       | 28             | 0                         |
| PRJNA320217          | Blood              | Blood               | Psychiatric illness        | 192            | 0                         |
| PRJNA599020          | Blood              | Blood               | Healthy                    | 45             | 0                         |
| PRJEB21446           | Reproductive tract | Vaginal fluid       | Bacterial vaginosis        | 40             | 0                         |
| PRJNA548791          | Reproductive tract | Endometrial biopsy  | Healthy                    | 27             | 0                         |
